# Supplementary material for: Unorthodox synthesis, biological activity and DFT studies of novel and multifunctionalized naphthoxocine derivatives
Source: Royal Society of Chemistry journal article supplement (doi:10.1039/c9ra05154f), 2019-01-01
Supplement: c9ra05154f1.pdf [file c9ra05154f1.pdf]

## Supporting Information

### Unorthodox Synthesis, biological activity and DFT studies of novel and multifunctionalized naphthoxocine derivatives

Mohamed Ahmed Abozeid,<sup>a</sup> Aya Atef El-Sawi,<sup>a</sup> Mohamed Ramadan Elmorsy, Mohamed Abdelmoteleb,<sup>b,c</sup> Abdel-Rahman Hassan Abdel-Rahman<sup>a</sup> and El-Sayed Ibrahim El-Desoky\*<sup>a</sup>

<sup>a</sup>*Department of Chemistry, Faculty of Science, Mansoura University, Mansoura-35516, Egypt*

<sup>b</sup>*Food Allergy Research & Resource Program (FARRP), Department of Food Science & Technology, University of Nebraska, Lincoln, NE, USA*

<sup>c</sup>*Department of Botany, Faculty of Science, Mansoura University, Mansoura-35516, Egypt*

#### Predicted IR spectrum of product 3a.

3450 cm<sup>-1</sup> (OH), 3280 cm<sup>-1</sup> (NH), 33105 cm<sup>-1</sup> (Aromatic CH), 1608 cm<sup>-1</sup> (C=N), 1530 cm<sup>-1</sup> (C=C)

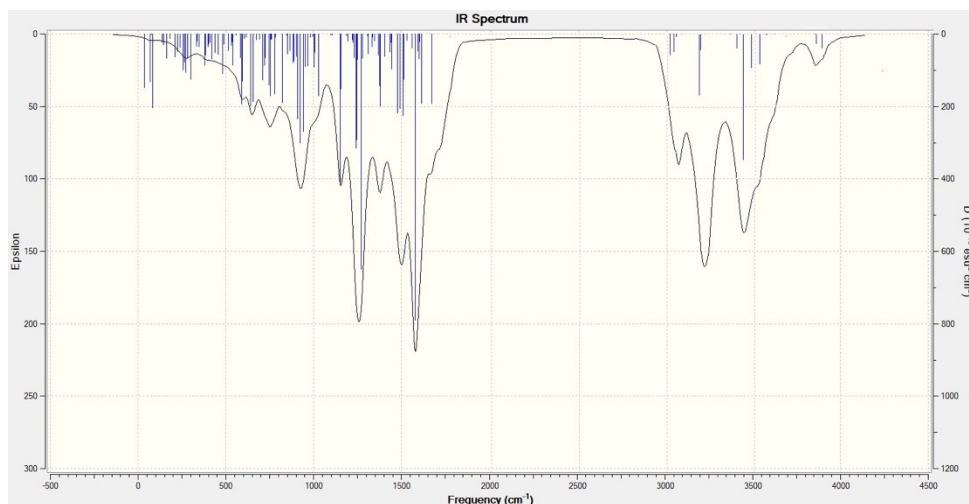

## Cartesian coordinates for the optimized geometries of compounds 3a-e and 6

Table 1: Cartesian coordinates for the optimized geometry of 3a.

| Atom | Cartesian Coordinates |          |          |
|------|-----------------------|----------|----------|
| C    | -0.31114              | 0.450591 | 0.058856 |
| C    | 0.515954              | 1.517585 | -0.15121 |
| H    | -1.32387              | 0.715985 | 0.279849 |
| C    | 1.131332              | -1.85782 | 0.075498 |
| C    | 7.624332              | -1.45027 | 0.092224 |
| C    | 6.712005              | -0.64083 | -0.50286 |
| C    | 5.34797               | -0.94042 | -0.41004 |
| C    | 4.935762              | -2.05913 | 0.303191 |
| C    | 5.888481              | -2.88865 | 0.905657 |
| C    | 7.207973              | -2.58934 | 0.801677 |
| H    | 4.713739              | 0.730412 | -1.58769 |
| H    | 8.666784              | -1.22003 | 0.020241 |
| H    | 7.035024              | 0.224446 | -1.0431  |
| C    | 4.396444              | -0.12766 | -1.03276 |
| C    | 3.572575              | -2.3415  | 0.414553 |
| H    | 5.576938              | -3.75668 | 1.448212 |
| H    | 7.935405              | -3.22407 | 1.263044 |
| H    | 3.250727              | -3.20449 | 0.959135 |
| C    | 3.071594              | -0.42239 | -0.94658 |
| C    | 2.621163              | -1.49387 | -0.17728 |
| O    | 0.921362              | -3.23155 | 0.412679 |
| H    | 0.051186              | -3.50511 | 0.113416 |
| O    | 2.167603              | 0.35724  | -1.67553 |
| C    | 1.818979              | 1.48779  | -0.9316  |
| N    | 2.59572               | 2.522231 | -0.9291  |
| H    | 3.448874              | 2.508145 | -1.45056 |
| C    | -1.31909              | -1.95099 | 0.09151  |
| H    | -1.25295              | -3.01878 | 0.110035 |
| C    | 0.075958              | 2.87442  | 0.429313 |
| C    | -0.01609              | 5.174309 | 0.730335 |
| C    | -1.25286              | 4.854818 | 1.253141 |

|          |          |          |          |
|----------|----------|----------|----------|
| <b>C</b> | 0.393243 | 6.504812 | 0.636131 |
| <b>C</b> | -2.17676 | 5.82814  | 1.624703 |
| <b>C</b> | -0.50656 | 7.515132 | 1.033118 |
| <b>H</b> | 1.366299 | 6.75305  | 0.266752 |
| <b>C</b> | -1.79529 | 7.178113 | 1.5128   |
| <b>H</b> | -3.14596 | 5.557692 | 1.988571 |
| <b>H</b> | -0.21462 | 8.542554 | 0.969293 |
| <b>H</b> | -2.47987 | 7.951344 | 1.792743 |
| <b>N</b> | 0.766731 | 3.985819 | 0.289428 |
| <b>S</b> | -1.42468 | 3.111188 | 1.351057 |
| <b>C</b> | -0.03572 | -1.10052 | 0.05594  |
| <b>N</b> | -2.47709 | -1.37445 | 0.098994 |
| <b>O</b> | -3.61045 | -2.12551 | 0.130401 |
| <b>H</b> | -3.43699 | -2.94726 | 0.595424 |

**Table 2:** Cartesian coordinates for the optimized geometry of **3b**.

| <b>Atom</b> | <b>Cartesian Coordinates</b> |          |          |
|-------------|------------------------------|----------|----------|
| <b>C</b>    | 0.269375                     | -1.13531 | -0.46637 |
| <b>C</b>    | -0.1024                      | 0.265859 | -0.32526 |
| <b>C</b>    | 0.527165                     | 1.461094 | -0.19368 |
| <b>H</b>    | -1.19009                     | 0.327466 | -0.31592 |
| <b>C</b>    | 1.47265                      | -1.82147 | -0.57875 |
| <b>C</b>    | 7.865862                     | -1.64772 | 0.655675 |
| <b>C</b>    | 7.050176                     | -0.67901 | 0.115112 |
| <b>C</b>    | 5.657382                     | -0.91305 | -0.04517 |
| <b>C</b>    | 5.11543                      | -2.17961 | 0.355275 |
| <b>C</b>    | 5.988141                     | -3.15908 | 0.909464 |
| <b>C</b>    | 7.330613                     | -2.8987  | 1.058805 |
| <b>H</b>    | 5.167164                     | 1.01374  | -0.91784 |
| <b>H</b>    | 8.925967                     | -1.45907 | 0.77661  |
| <b>H</b>    | 7.458571                     | 0.276709 | -0.19412 |
| <b>C</b>    | 4.775894                     | 0.060977 | -0.58378 |
| <b>C</b>    | 3.735577                     | -2.42838 | 0.162227 |
| <b>H</b>    | 5.57331                      | -4.11444 | 1.211546 |
| <b>H</b>    | 7.988054                     | -3.64809 | 1.48272  |

|          |          |          |          |
|----------|----------|----------|----------|
| <b>H</b> | 3.338415 | -3.40291 | 0.41026  |
| <b>C</b> | 3.437167 | -0.20019 | -0.72355 |
| <b>C</b> | 2.882926 | -1.45604 | -0.34245 |
| <b>O</b> | 1.443902 | -3.19924 | -0.84984 |
| <b>H</b> | 0.629513 | -3.44473 | -1.35628 |
| <b>O</b> | 2.545522 | 0.753301 | -1.23352 |
| <b>C</b> | 1.988036 | 1.637105 | -0.19737 |
| <b>N</b> | 2.655827 | 2.376639 | 0.562183 |
| <b>H</b> | 3.667516 | 2.363429 | 0.339209 |
| <b>C</b> | -0.93902 | -2.0074  | -0.39846 |
| <b>H</b> | -0.75183 | -3.06056 | -0.17107 |
| <b>C</b> | -0.25434 | 2.686796 | -0.03623 |
| <b>C</b> | -0.78035 | 4.875491 | 0.064524 |
| <b>C</b> | -2.10078 | 4.403437 | 0.248    |
| <b>C</b> | -0.53971 | 6.254322 | 0.046584 |
| <b>C</b> | -3.16933 | 5.276476 | 0.410146 |
| <b>C</b> | -1.60503 | 7.133369 | 0.209171 |
| <b>H</b> | 0.473954 | 6.605185 | -0.09366 |
| <b>C</b> | -2.91102 | 6.648732 | 0.389854 |
| <b>H</b> | -4.17718 | 4.906964 | 0.549673 |
| <b>H</b> | -1.42779 | 8.201872 | 0.197015 |
| <b>H</b> | -3.73005 | 7.346705 | 0.515593 |
| <b>N</b> | 0.199975 | 3.8942   | -0.08826 |
| <b>S</b> | -2.11916 | 2.590857 | 0.233615 |
| <b>C</b> | -3.29794 | -2.30624 | -0.27191 |
| <b>C</b> | -4.50541 | -1.73462 | -0.70859 |
| <b>C</b> | -3.33962 | -3.57334 | 0.340183 |
| <b>C</b> | -5.71192 | -2.40764 | -0.56026 |
| <b>H</b> | -4.45913 | -0.75817 | -1.17344 |
| <b>C</b> | -4.54737 | -4.24057 | 0.502764 |
| <b>H</b> | -2.43305 | -4.03005 | 0.719748 |
| <b>C</b> | -5.74081 | -3.66891 | 0.04603  |
| <b>H</b> | -6.62979 | -1.96329 | -0.92429 |
| <b>H</b> | -4.59207 | -5.21131 | 0.979442 |
| <b>C</b> | -8.00292 | -3.73861 | 0.933836 |

|          |          |          |          |
|----------|----------|----------|----------|
| <b>H</b> | -8.83721 | -4.44019 | 0.911035 |
| <b>H</b> | -7.70445 | -3.54426 | 1.970735 |
| <b>H</b> | -8.30244 | -2.7958  | 0.462384 |
| <b>O</b> | -6.91873 | -4.40546 | 0.189928 |
| <b>N</b> | -2.13252 | -1.53631 | -0.48317 |

**Table 3:** Cartesian coordinates for the optimized geometry of **3c**.

| <b>Atom</b> | <b>Cartesian Coordinates</b> |          |          |
|-------------|------------------------------|----------|----------|
| <b>C</b>    | -0.21931                     | 0.417366 | -0.15099 |
| <b>C</b>    | -1.21901                     | 0.81734  | 0.662981 |
| <b>H</b>    | -0.04225                     | 1.021914 | -1.03914 |
| <b>C</b>    | 0.428102                     | -2.01934 | 0.168921 |
| <b>C</b>    | -5.38824                     | -4.74535 | -0.88    |
| <b>C</b>    | -5.00635                     | -3.7855  | 0.029128 |
| <b>C</b>    | -3.65307                     | -3.35497 | 0.102158 |
| <b>C</b>    | -2.69042                     | -3.9383  | -0.78938 |
| <b>C</b>    | -3.11965                     | -4.93069 | -1.71447 |
| <b>C</b>    | -4.43691                     | -5.3244  | -1.75917 |
| <b>H</b>    | -3.91407                     | -1.9816  | 1.766872 |
| <b>H</b>    | -6.42214                     | -5.06613 | -0.92907 |
| <b>H</b>    | -5.73135                     | -3.34311 | 0.703319 |
| <b>C</b>    | -3.21637                     | -2.38832 | 1.045806 |
| <b>C</b>    | -1.34316                     | -3.50241 | -0.72147 |
| <b>H</b>    | -2.38856                     | -5.36976 | -2.38461 |
| <b>H</b>    | -4.75623                     | -6.07992 | -2.46711 |
| <b>H</b>    | -0.60715                     | -3.93732 | -1.38707 |
| <b>C</b>    | -1.90388                     | -1.99199 | 1.083434 |
| <b>C</b>    | -0.96203                     | -2.51294 | 0.161774 |
| <b>O</b>    | 1.333544                     | -3.03738 | 0.22501  |
| <b>H</b>    | 2.285581                     | -2.80795 | 0.461872 |
| <b>O</b>    | -1.43498                     | -1.17129 | 2.125718 |
| <b>C</b>    | -1.45991                     | 0.245986 | 2.014152 |
| <b>N</b>    | -1.58827                     | 0.969132 | 3.039453 |
| <b>H</b>    | -1.72091                     | 0.424914 | 3.907785 |
| <b>C</b>    | 2.114199                     | -0.39648 | -0.31851 |

|   |          |          |          |
|---|----------|----------|----------|
| H | 2.699748 | -1.26132 | -0.61406 |
| C | -2.06716 | 1.961914 | 0.314161 |
| C | -3.86459 | 3.293556 | 0.240585 |
| C | -3.04544 | 4.01776  | -0.66739 |
| C | -5.1528  | 3.756414 | 0.533714 |
| C | -3.50482 | 5.18785  | -1.27475 |
| C | -5.60837 | 4.920575 | -0.07184 |
| H | -5.76413 | 3.195892 | 1.228587 |
| C | -4.79017 | 5.630776 | -0.96927 |
| H | -2.88139 | 5.741265 | -1.96604 |
| H | -6.6031  | 5.28851  | 0.148537 |
| H | -5.1639  | 6.537199 | -1.43062 |
| N | -3.27509 | 2.144403 | 0.768655 |
| S | -1.49763 | 3.225972 | -0.83392 |
| N | 2.673011 | 0.783005 | -0.28574 |
| C | 0.739419 | -0.68813 | -0.02402 |
| C | 4.048307 | 0.819873 | -0.36921 |
| N | 4.735693 | 1.929579 | -0.73258 |
| H | 4.347429 | 2.815548 | -1.02874 |
| C | 5.028743 | -0.14436 | -0.01575 |
| C | 4.707393 | -1.42098 | 0.453423 |
| N | 4.274817 | -2.44936 | 0.81039  |
| C | 6.286734 | 0.504117 | -0.21547 |
| C | 8.913004 | 1.217001 | -0.35426 |
| H | 9.945578 | 0.889611 | -0.21383 |
| H | 8.745115 | 1.511639 | -1.39098 |
| H | 8.688485 | 2.058491 | 0.302585 |
| S | 7.854481 | -0.21618 | 0.073547 |
| N | 6.1369   | 1.765599 | -0.65645 |

**Table 4:** Cartesian coordinates for the optimized geometry of **3d**.

| Atom | Cartesian Coordinates |          |          |
|------|-----------------------|----------|----------|
| C    | -0.48913              | 0.529743 | 0.62042  |
| C    | -0.54752              | -0.79832 | 0.34638  |
| H    | -1.46126              | 1.014182 | 0.705476 |

|          |          |          |          |
|----------|----------|----------|----------|
| <b>C</b> | 1.927521 | 1.527028 | 0.879674 |
| <b>C</b> | 7.318478 | -1.64397 | -0.93953 |
| <b>C</b> | 6.151822 | -2.13594 | -0.39838 |
| <b>C</b> | 5.070777 | -1.26408 | -0.09582 |
| <b>C</b> | 5.217831 | 0.139654 | -0.35303 |
| <b>C</b> | 6.438614 | 0.614241 | -0.91212 |
| <b>C</b> | 7.463426 | -0.25671 | -1.20113 |
| <b>H</b> | 3.721044 | -2.77935 | 0.676555 |
| <b>H</b> | 8.136087 | -2.31677 | -1.16952 |
| <b>H</b> | 6.040682 | -3.19566 | -0.19723 |
| <b>C</b> | 3.844456 | -1.72796 | 0.448971 |
| <b>C</b> | 4.156747 | 1.014315 | -0.01805 |
| <b>H</b> | 6.544309 | 1.676049 | -1.10561 |
| <b>H</b> | 8.388566 | 0.111449 | -1.62786 |
| <b>H</b> | 4.289623 | 2.078129 | -0.15808 |
| <b>C</b> | 2.822866 | -0.85714 | 0.728197 |
| <b>C</b> | 2.954763 | 0.541324 | 0.490548 |
| <b>O</b> | 2.602867 | 2.701192 | 1.250879 |
| <b>H</b> | 2.042734 | 3.260285 | 1.845558 |
| <b>O</b> | 1.596794 | -1.2952  | 1.246953 |
| <b>C</b> | 0.628438 | -1.67135 | 0.204692 |
| <b>N</b> | 0.803993 | -2.55727 | -0.6637  |
| <b>H</b> | 1.695333 | -3.069   | -0.53315 |
| <b>C</b> | -0.07237 | 2.898967 | 0.932172 |
| <b>H</b> | 0.605638 | 3.740195 | 0.763239 |
| <b>C</b> | -1.84294 | -1.45374 | 0.172589 |
| <b>C</b> | -3.39621 | -3.07252 | -0.03753 |
| <b>C</b> | -4.3104  | -1.99388 | -0.06582 |
| <b>C</b> | -3.87641 | -4.38328 | -0.14097 |
| <b>C</b> | -5.67807 | -2.20279 | -0.19278 |
| <b>C</b> | -5.2443  | -4.59893 | -0.2691  |
| <b>H</b> | -3.16887 | -5.20132 | -0.11902 |
| <b>C</b> | -6.1396  | -3.51685 | -0.29503 |
| <b>H</b> | -6.37123 | -1.3716  | -0.2132  |
| <b>H</b> | -5.6245  | -5.60994 | -0.35016 |

|   |          |          |          |
|---|----------|----------|----------|
| H | -7.20236 | -3.70168 | -0.39587 |
| N | -2.05115 | -2.72563 | 0.095953 |
| S | -3.41975 | -0.42186 | 0.080826 |
| N | -1.23088 | 3.116165 | -0.14078 |
| C | -4.23568 | 4.53415  | -1.32577 |
| H | -5.30496 | 4.696577 | -1.03915 |
| N | -2.24562 | 5.355611 | -0.13254 |
| C | 0.560382 | 1.499046 | 0.825188 |
| C | -2.43041 | 3.886227 | 0.218426 |
| N | -3.64373 | 3.370974 | -0.54247 |
| H | -3.99093 | 2.433263 | -0.52998 |
| N | -3.40783 | 5.774335 | -1.02135 |

**Table 5:** Cartesian coordinates for the optimized geometry of **3e**.

| <b>Atom</b> | <b>Cartesian Coordinates</b> |          |          |
|-------------|------------------------------|----------|----------|
| C           | 0.071134                     | 0.012107 | -0.02395 |
| C           | -0.80693                     | 0.688026 | 0.740077 |
| H           | 0.438372                     | 0.498007 | -0.92564 |
| C           | -0.02092                     | -2.47961 | 0.242618 |
| C           | -6.34372                     | -3.44057 | -0.93891 |
| C           | -5.72806                     | -2.63736 | -0.00615 |
| C           | -4.31056                     | -2.60263 | 0.095706 |
| C           | -3.53099                     | -3.41948 | -0.79088 |
| C           | -4.20055                     | -4.2407  | -1.74087 |
| C           | -5.57417                     | -4.25065 | -1.81364 |
| H           | -4.21048                     | -1.23104 | 1.777861 |
| H           | -7.42486                     | -3.45917 | -1.01035 |
| H           | -6.31473                     | -2.01902 | 0.664142 |
| C           | -3.63957                     | -1.8076  | 1.061189 |
| C           | -2.11893                     | -3.37521 | -0.69276 |
| H           | -3.60697                     | -4.85675 | -2.40759 |
| H           | -6.07722                     | -4.87729 | -2.54039 |
| H           | -1.51876                     | -3.98852 | -1.35364 |
| C           | -2.2697                      | -1.78857 | 1.129778 |
| C           | -1.48828                     | -2.54265 | 0.21316  |



|          |          |          |          |
|----------|----------|----------|----------|
| <b>O</b> | 0.534433 | -3.73588 | 0.155061 |
| <b>H</b> | 1.518612 | -3.69898 | 0.024809 |
| <b>O</b> | -1.63545 | -1.1334  | 2.198896 |
| <b>C</b> | -1.22074 | 0.22374  | 2.091173 |
| <b>N</b> | -1.13685 | 0.952349 | 3.11634  |
| <b>H</b> | -1.44119 | 0.476301 | 3.981538 |
| <b>C</b> | 2.133806 | -1.32691 | 0.152061 |
| <b>H</b> | 2.669847 | -2.27192 | 0.297083 |
| <b>C</b> | -1.33036 | 1.997047 | 0.340526 |
| <b>C</b> | -2.71417 | 3.751791 | 0.214215 |
| <b>C</b> | -1.75259 | 4.190264 | -0.73586 |
| <b>C</b> | -3.82785 | 4.55193  | 0.494712 |
| <b>C</b> | -1.90026 | 5.410522 | -1.39792 |
| <b>C</b> | -3.97324 | 5.7658   | -0.16503 |
| <b>H</b> | -4.55022 | 4.205922 | 1.222208 |
| <b>C</b> | -3.01645 | 6.191491 | -1.10428 |
| <b>H</b> | -1.16834 | 5.746283 | -2.1221  |
| <b>H</b> | -4.83071 | 6.393618 | 0.04488  |
| <b>H</b> | -3.1478  | 7.141883 | -1.60795 |
| <b>N</b> | -2.4381  | 2.512967 | 0.794564 |
| <b>S</b> | -0.47296 | 3.009017 | -0.87579 |
| <b>N</b> | 2.823638 | -0.24324 | -0.05104 |
| <b>C</b> | 0.692293 | -1.30856 | 0.210123 |
| <b>C</b> | 6.274417 | -0.97652 | -0.14132 |
| <b>C</b> | 6.290081 | 0.446785 | -0.26755 |
| <b>C</b> | 7.481719 | 1.162629 | -0.38062 |
| <b>C</b> | 8.668289 | 0.434126 | -0.36702 |
| <b>C</b> | 8.667679 | -0.97177 | -0.24405 |
| <b>C</b> | 7.480245 | -1.68511 | -0.13128 |
| <b>C</b> | 4.198407 | -0.33899 | -0.1057  |
| <b>H</b> | 7.491638 | 2.241561 | -0.47464 |
| <b>H</b> | 9.613127 | 0.957691 | -0.45234 |
| <b>H</b> | 9.61351  | -1.50028 | -0.23712 |
| <b>H</b> | 7.470991 | -2.76299 | -0.03531 |
| <b>N</b> | 4.958285 | -1.4336  | -0.04334 |

|          |          |          |          |
|----------|----------|----------|----------|
| <b>N</b> | 4.956527 | 0.820337 | -0.24425 |
| <b>H</b> | 4.56596  | 1.752827 | -0.29577 |

**Table 6:** Cartesian coordinates for the optimized geometry of **6**.

| <b>Atom</b> | <b>Cartesian Coordinates</b> |          |          |
|-------------|------------------------------|----------|----------|
| <b>C</b>    | -0.28768                     | 0.29278  | 0.128571 |
| <b>C</b>    | 0.490745                     | 1.3897   | -0.11546 |
| <b>H</b>    | -1.30625                     | 0.518491 | 0.365733 |
| <b>C</b>    | 1.254671                     | -1.95398 | 0.144129 |
| <b>C</b>    | 7.724997                     | -1.25318 | 0.026201 |
| <b>C</b>    | 6.765081                     | -0.49403 | -0.55964 |
| <b>C</b>    | 5.418374                     | -0.85837 | -0.44114 |
| <b>C</b>    | 5.071735                     | -1.98886 | 0.288351 |
| <b>C</b>    | 6.073757                     | -2.76782 | 0.878204 |
| <b>C</b>    | 7.375653                     | -2.40594 | 0.749636 |
| <b>H</b>    | 4.686163                     | 0.766365 | -1.62446 |
| <b>H</b>    | 8.753889                     | -0.97274 | -0.06412 |
| <b>H</b>    | 7.037061                     | 0.381221 | -1.11222 |
| <b>C</b>    | 4.418849                     | -0.09828 | -1.05414 |
| <b>C</b>    | 3.724669                     | -2.33265 | 0.429058 |
| <b>H</b>    | 5.814193                     | -3.64658 | 1.430572 |
| <b>H</b>    | 8.140465                     | -3.0015  | 1.202569 |
| <b>H</b>    | 3.453795                     | -3.20536 | 0.985444 |
| <b>C</b>    | 3.110484                     | -0.45249 | -0.93873 |
| <b>C</b>    | 2.723178                     | -1.53247 | -0.14828 |
| <b>O</b>    | 1.109247                     | -3.33071 | 0.501918 |
| <b>H</b>    | 0.244149                     | -3.64372 | 0.227393 |
| <b>O</b>    | 2.158126                     | 0.275306 | -1.65831 |
| <b>C</b>    | 1.778494                     | 1.399732 | -0.92105 |
| <b>N</b>    | 2.513509                     | 2.464259 | -0.94481 |
| <b>H</b>    | 3.358358                     | 2.477229 | -1.47967 |
| <b>C</b>    | -1.18732                     | -2.1531  | 0.234135 |
| <b>H</b>    | -1.07144                     | -3.216   | 0.273069 |
| <b>C</b>    | 0.014693                     | 2.742617 | 0.447544 |
| <b>C</b>    | -0.13698                     | 5.044996 | 0.698956 |

|          |          |          |          |
|----------|----------|----------|----------|
| <b>C</b> | -1.35327 | 4.703504 | 1.254789 |
| <b>C</b> | 0.233889 | 6.382957 | 0.565689 |
| <b>C</b> | -2.29556 | 5.660445 | 1.624342 |
| <b>C</b> | -0.68433 | 7.377523 | 0.958575 |
| <b>H</b> | 1.191912 | 6.648096 | 0.169994 |
| <b>C</b> | -1.95305 | 7.017595 | 1.473458 |
| <b>H</b> | -3.24934 | 5.37281  | 2.015247 |
| <b>H</b> | -0.4221  | 8.410096 | 0.864771 |
| <b>H</b> | -2.65171 | 7.77889  | 1.7504   |
| <b>N</b> | 0.669008 | 3.869965 | 0.268754 |
| <b>S</b> | -1.47395 | 2.957489 | 1.394712 |
| <b>C</b> | 0.055336 | -1.24593 | 0.144951 |
| <b>C</b> | -2.42754 | -1.60817 | 0.264376 |
| <b>H</b> | -2.54788 | -0.54632 | 0.214721 |
| <b>C</b> | -5.85093 | -2.16201 | 0.433968 |
| <b>C</b> | -5.59713 | -2.51614 | -1.02066 |
| <b>H</b> | -6.20574 | -3.31147 | -1.39808 |
| <b>H</b> | -5.75902 | -1.65359 | -1.63228 |
| <b>N</b> | -3.60817 | -2.47835 | 0.367285 |
| <b>N</b> | -4.7185  | -1.85839 | 1.026019 |
| <b>O</b> | -7.1348  | -2.15737 | 1.064386 |
| <b>H</b> | -7.69979 | -2.81059 | 0.644827 |
| <b>C</b> | -4.1276  | -2.85846 | -0.95887 |
| <b>N</b> | -3.43964 | -3.39984 | -1.91177 |
| <b>H</b> | -2.46785 | -3.59486 | -1.77866 |
